# Supplementary material
Source: Springer Nature journal article supplement (https://www.springermedizin.de/resource/supplementary/12865_2008_235_MOESM3_ESM.pdf/9427566)
Supplement: MOESM3 [file 9427566]

immortalized keratinocytes/lentivirius

|               | PAK1 |   |   | PAK 299 |   |   | PAK Triple |   |   |
|---------------|------|---|---|---------|---|---|------------|---|---|
| TNF- $\alpha$ | -    | + | - | -       | + | - | -          | + | - |
| TGF- $\beta$  | -    | - | + | -       | - | + | -          | - | + |

**(A)**

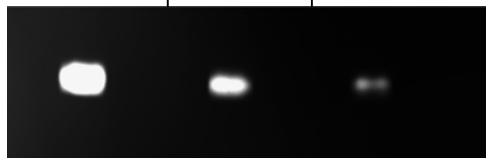

proMMP-9

|               | PAK1 |   | PAK 299 |   | PAK Triple |   |
|---------------|------|---|---------|---|------------|---|
| TNF- $\alpha$ | -    | + | -       | + | -          | + |

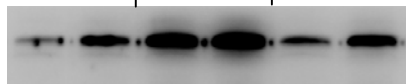

← 66-kDa PAK1

**(B)**

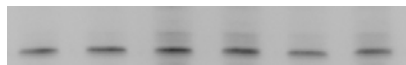

← NS
